# Supplementary material for: A Multicenter Observational Cohort Study to Evaluate the Effects of Bisphosphonate Exposure on Bone Mineral Density and Other Health Outcomes in Osteogenesis Imperfecta
Source: PubMed Central journal article supplement (PMC6524673; doi:10.1002/jbm4.10118), 2019-01-07
Supplement: JBM4-3-na-s002.pdf [file JBM4-3-na-s002.pdf]

**A**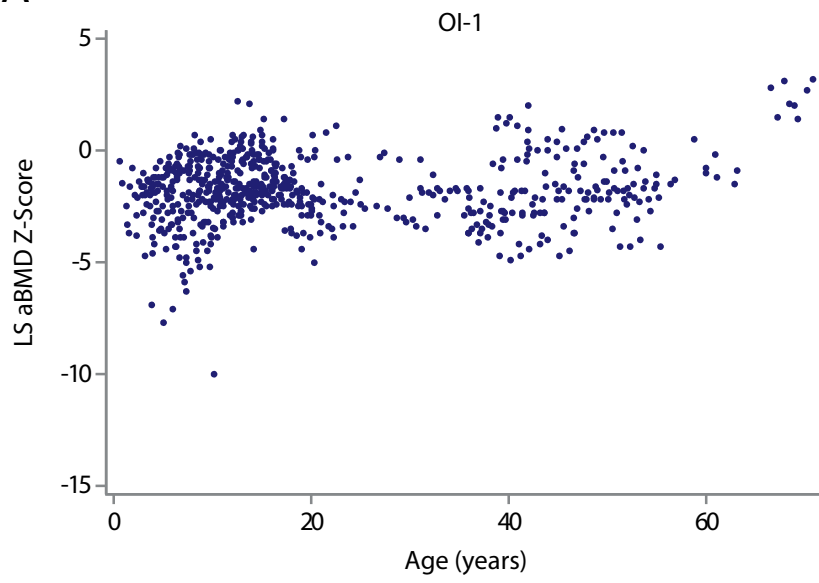**B**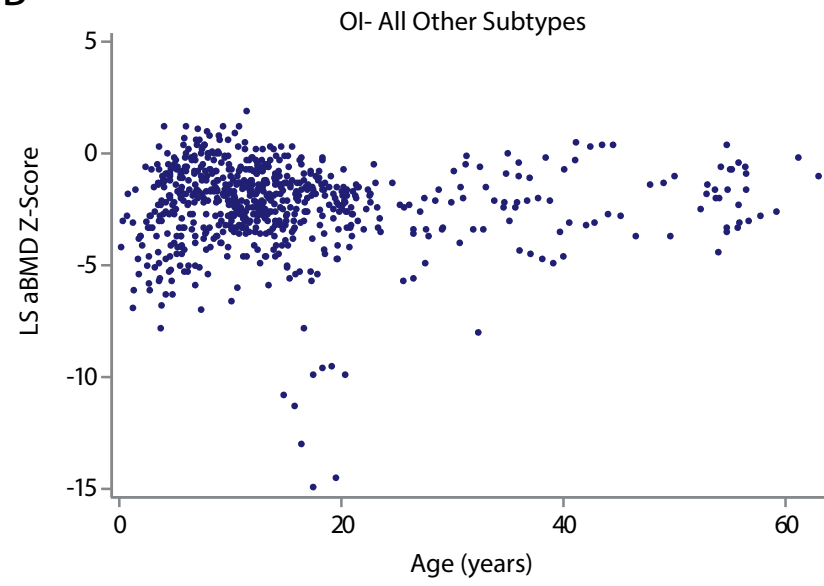**Supplemental Figure 1**

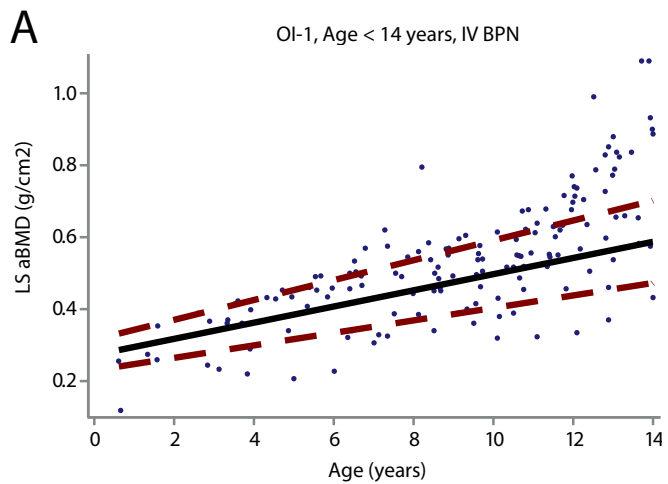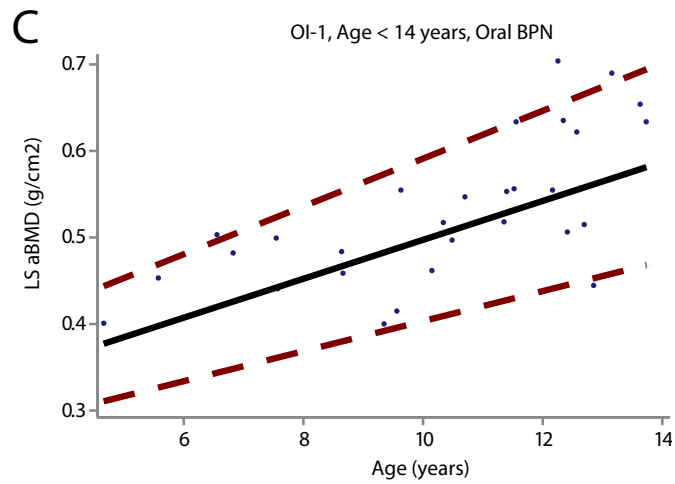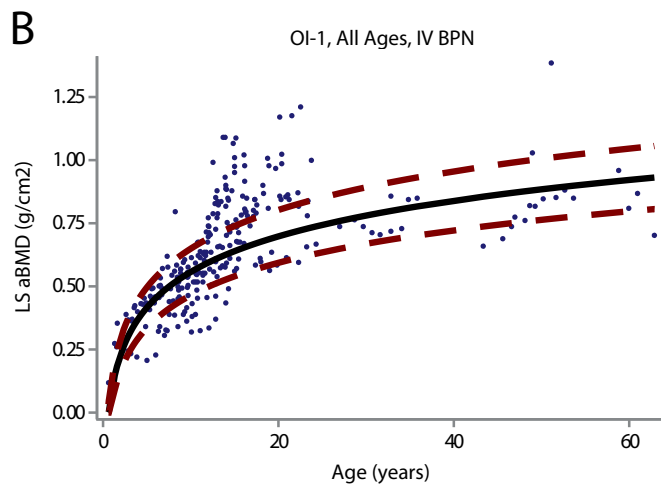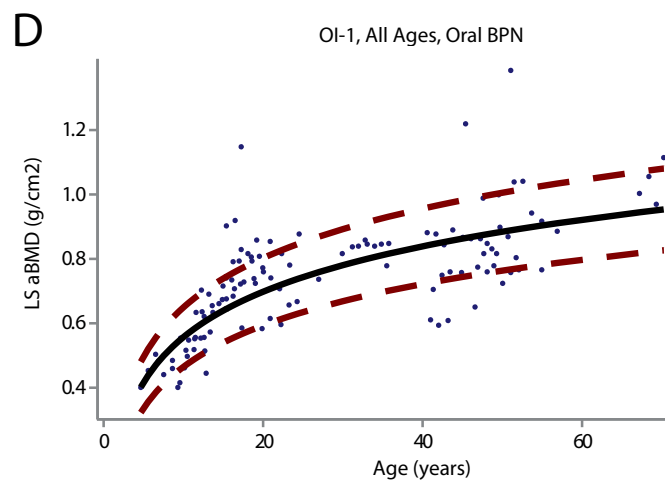

**Supplemental Figure 2**

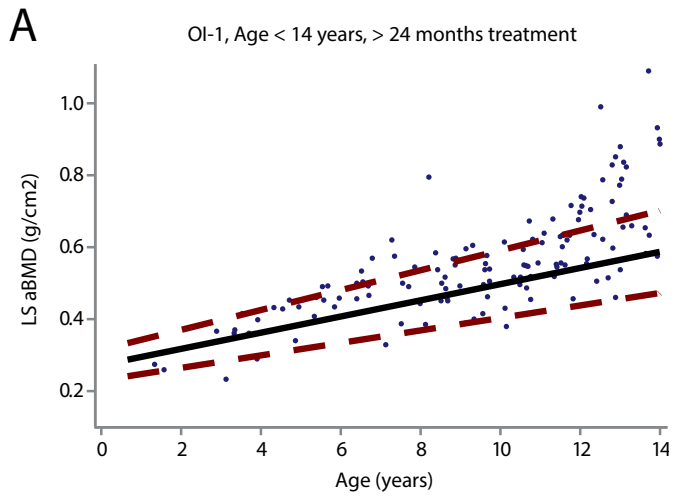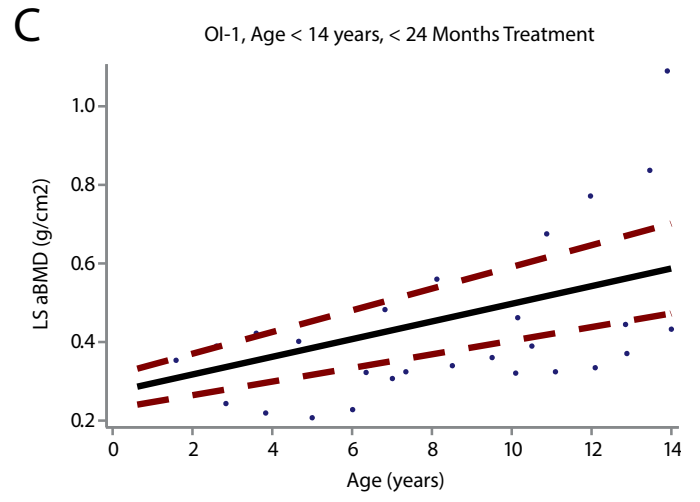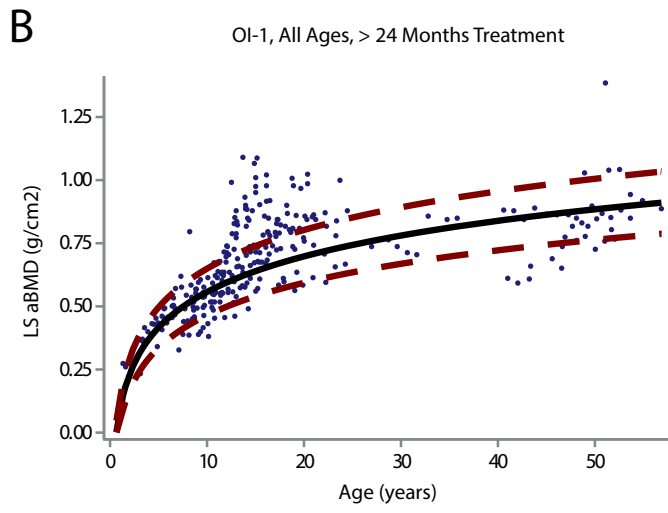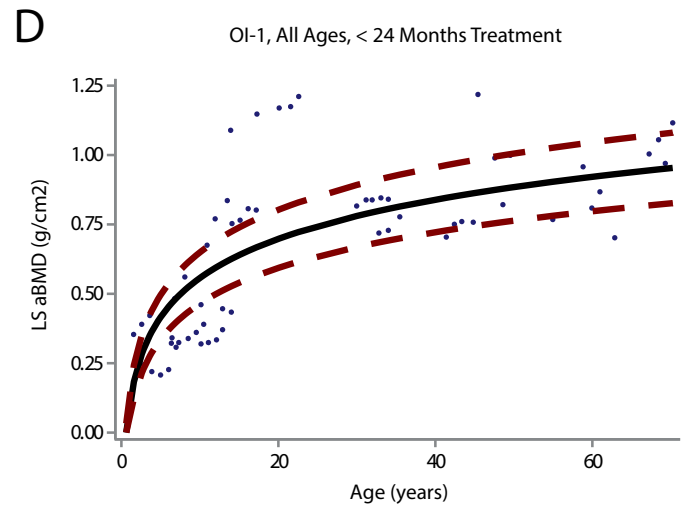

**Supplemental Figure 3**

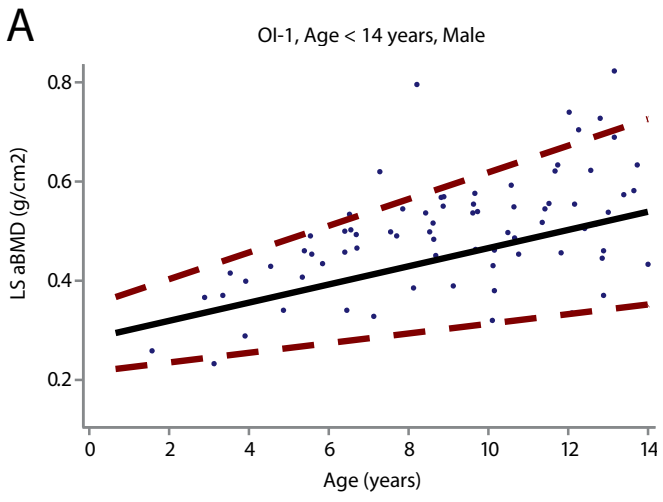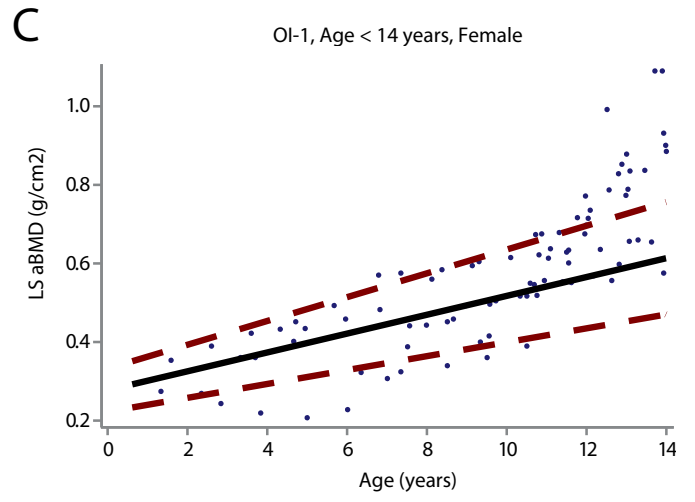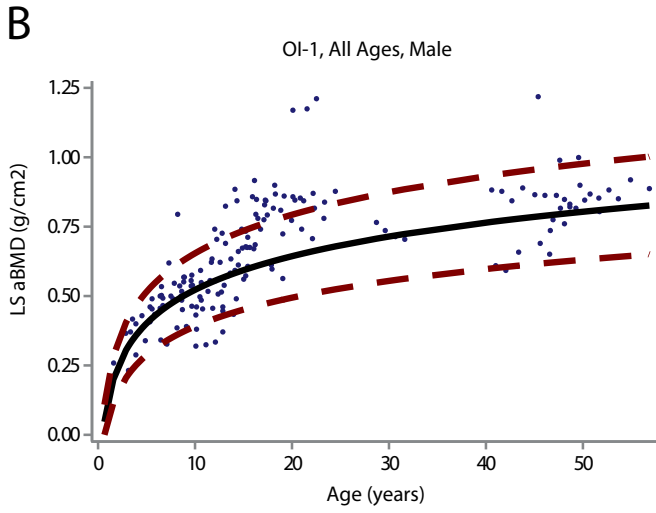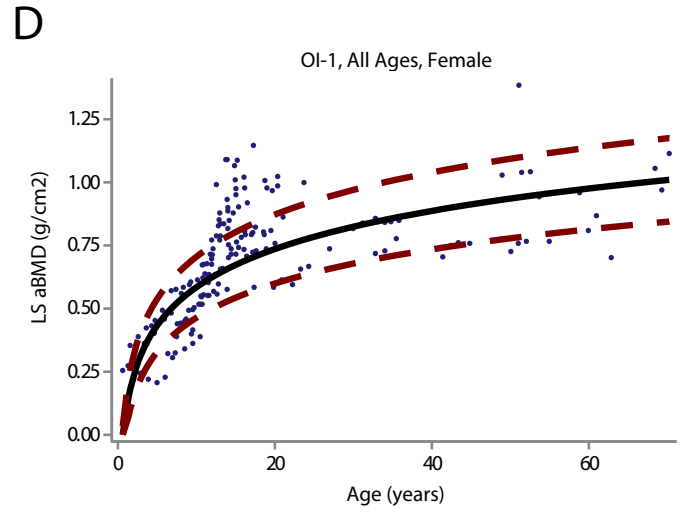

**Supplemental Figure 4**

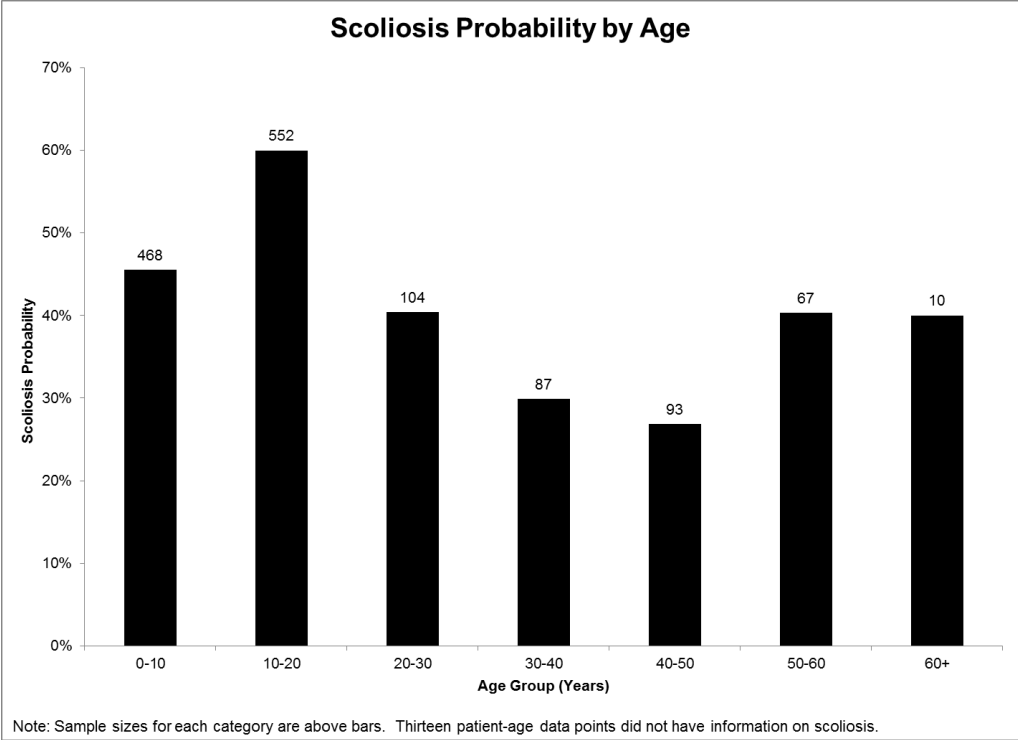

**Supplemental Figure 5**

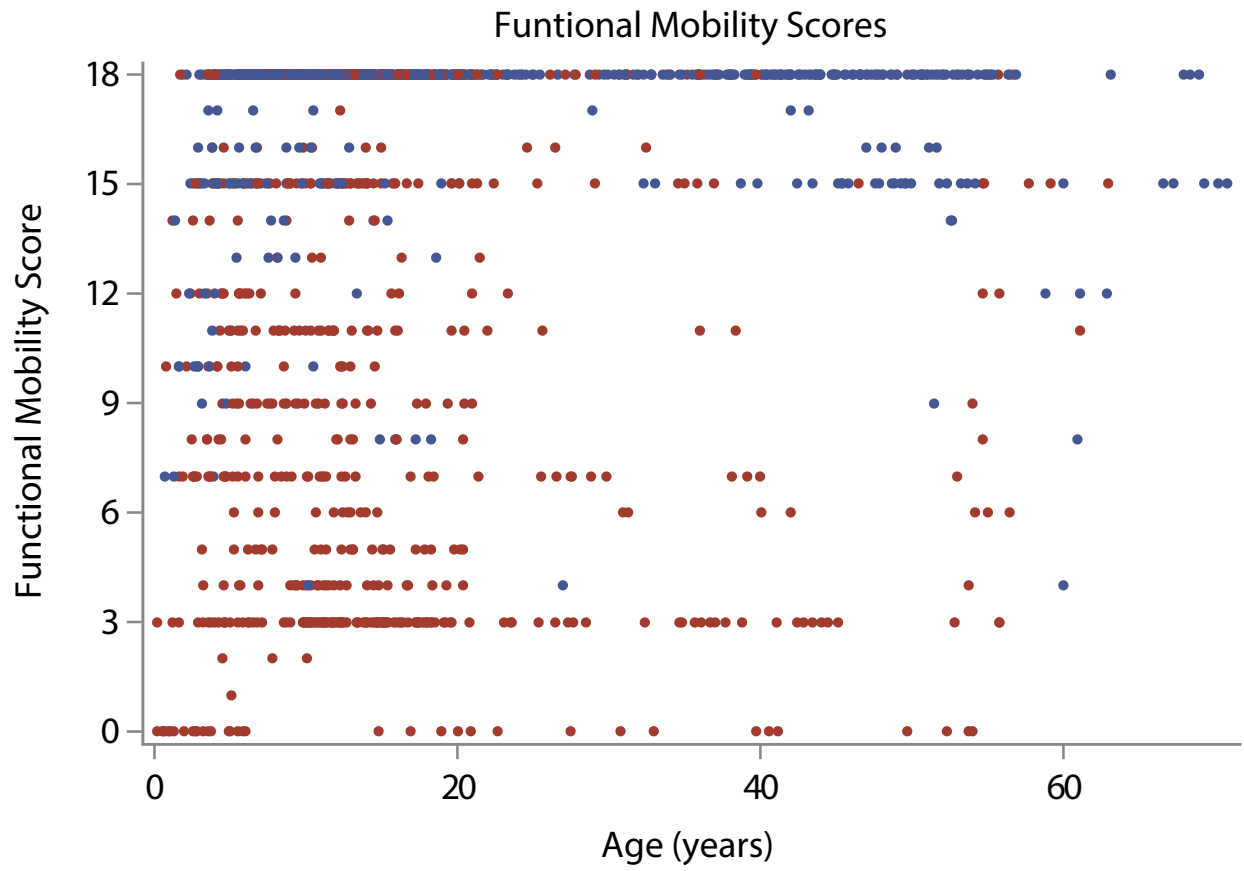

**Supplemental Figure 6**
